# Supplementary material
Source: PubMed Central journal article supplement (PMC9827459)
Supplement: NIHMS1858196-supplement-Appendix_1_Centralized_TOC_Pharmacy_Intervention_Tracking_Form.pdf [file NIHMS1858196-supplement-Appendix_1_Centralized_TOC_Pharmacy_Intervention_Tracking_Form.pdf]

Patient Number: \_\_\_\_\_

Date of PharmD TOC visit: \_\_\_\_\_

# Rx meds used at least weekly: \_\_\_\_\_ # of OTC/vitamins/supplements used at least weekly: \_\_\_\_\_

| MRP Related to (circle one)<br>H: Hospitalization<br>O: Other Medical Problems | Indication | Medication(s) Involved                           | Medication or Health Related Problem<br>Use Key | Intervention/ Recommendation:<br>Use Key | Intervention Accepted by Provider<br>Within 30 days of discharge?                           | Intervention Accepted by Patient<br>Within 30 days of discharge?                            |
|--------------------------------------------------------------------------------|------------|--------------------------------------------------|-------------------------------------------------|------------------------------------------|---------------------------------------------------------------------------------------------|---------------------------------------------------------------------------------------------|
| H      O                                                                       |            | Original:<br><br>Modified after follow-up visit: |                                                 | <input type="checkbox"/> Recommend -     | <input type="checkbox"/> Yes<br><input type="checkbox"/> No<br><input type="checkbox"/> N/A | <input type="checkbox"/> Yes<br><input type="checkbox"/> No<br><input type="checkbox"/> N/A |

| Key: Medication or Health Related Problem (MRP)                                                                                                                                                                                                                                                                                                                                                                                                                                                                                                                                                                                                                                                                                                                                                                                                                                                                                                                                                                                                                                                                                                                                                                                                                                                                                                                                                                                                                                                                                                   | Key: Recommendation                                                                                                                                                                                                                                                                                                                                                                                                                                                                                                                                                                                                                                                                                                                                                                                                                                                                                                                                                                                                                                                                                                                                                                                                                                                                                                                                                                         |
|---------------------------------------------------------------------------------------------------------------------------------------------------------------------------------------------------------------------------------------------------------------------------------------------------------------------------------------------------------------------------------------------------------------------------------------------------------------------------------------------------------------------------------------------------------------------------------------------------------------------------------------------------------------------------------------------------------------------------------------------------------------------------------------------------------------------------------------------------------------------------------------------------------------------------------------------------------------------------------------------------------------------------------------------------------------------------------------------------------------------------------------------------------------------------------------------------------------------------------------------------------------------------------------------------------------------------------------------------------------------------------------------------------------------------------------------------------------------------------------------------------------------------------------------------|---------------------------------------------------------------------------------------------------------------------------------------------------------------------------------------------------------------------------------------------------------------------------------------------------------------------------------------------------------------------------------------------------------------------------------------------------------------------------------------------------------------------------------------------------------------------------------------------------------------------------------------------------------------------------------------------------------------------------------------------------------------------------------------------------------------------------------------------------------------------------------------------------------------------------------------------------------------------------------------------------------------------------------------------------------------------------------------------------------------------------------------------------------------------------------------------------------------------------------------------------------------------------------------------------------------------------------------------------------------------------------------------|
| <ol style="list-style-type: none"> <li>1. Untreated indication/medical problem</li> <li>2. Sub-therapeutic dosage (drug dosing, interval, or duration not adequate for treatment goals)</li> <li>3. Improper drug selection (treatment not optimal based on current evidence/guidelines)</li> <li>4. Over-dosage (drug dosing, interval, or duration excessive for treatment goals/ provider over-prescribing)</li> <li>5. Incomplete/improper instructions</li> <li>6. Drug use without indication</li> <li>7. Polypharmacy (multiple different medications to treat same condition)</li> <li>8. Duplication (same medication listed more than once)</li> <li>9. Adverse drug reaction</li> <li>10. Drug interaction</li> <li>11. Lab/diagnostic test indicated, not ordered</li> <li>12. Abnormal lab result not addressed</li> <li>13. Patient medication overuse</li> <li>14. Patient medication underuse</li> <li>15. Dosage form is not reasonable for patient</li> <li>16. Inadequate patient self-management of lifestyle and other non-drug variables</li> <li>17. Failure to receive drug (not available in prescribed strength/patient did not receive medication)</li> <li>18. Inadequate refills between scheduled visits</li> <li>19. Non-formulary/not cost effective drug choice</li> <li>20. No follow-up appointment with provider (PCP, PharmD, etc.)</li> <li>21. Pill burden</li> <li>22. Need for assessment/monitoring</li> <li>23. Need for information (including patient/family concerns)</li> <li>24. Other</li> </ol> | <ol style="list-style-type: none"> <li>A. Start medication</li> <li>B. Stop medication</li> <li>C. Change medication</li> <li>D. Adjust dose</li> <li>E. Adjust interval</li> <li>F. Adverse drug reaction review/information provided</li> <li>G. Drug interaction review/information provided</li> <li>H. Lab monitoring</li> <li>I. Patient education provided               <ol style="list-style-type: none"> <li>a. Medication related</li> <li>b. Care related</li> <li>c. Appointment related</li> <li>d. Smoking cessation</li> </ol> </li> <li>J. Coordination of care               <ol style="list-style-type: none"> <li>a. Refer to other service                   <ol style="list-style-type: none"> <li>i. PharmD</li> <li>ii. Nurse</li> <li>iii. Social work</li> <li>iv. Dietician</li> <li>v. Diabetes education</li> </ol> </li> <li>b. Refill request</li> <li>c. Made appointment with provider                   <ol style="list-style-type: none"> <li>i. PCP</li> <li>ii. PharmD</li> <li>iii. Other</li> </ol> </li> <li>d. Outreach to Pharmacy</li> <li>e. Communication of info (for provider)</li> </ol> </li> <li>K. Provider review request               <ol style="list-style-type: none"> <li>a. Symptoms monitoring</li> <li>b. Objective monitoring</li> <li>c. Medication reconciliation</li> <li>d. Other</li> </ol> </li> <li>L. Other</li> </ol> |

Date collected: \_\_\_ / \_\_\_ / 20\_\_\_

Date entered: \_\_\_ / \_\_\_ / 20\_\_\_

Initials:

Initials:
